# Supplementary material for: Oxidation route dependent proton conductivities of oxidized fullerenes
Source: Royal Society of Chemistry journal article supplement (doi:10.1039/c7nj02964k), 2017-01-01
Supplement: c7nj02964k1.pdf [file c7nj02964k1.pdf]

## Supporting Information

### Oxidation Route Dependent Proton Conductivities of Oxidized Fullerenes

Nurun Nahar Rabin,<sup>a</sup> Mohammad Razaul Karim,<sup>a,b</sup> Md. Saidul Islam,<sup>a</sup> Hitomi Omagari,<sup>a</sup> Narumi Kameda,<sup>a</sup> Yuta Shudo,<sup>aa</sup> Ryo Ohtani,<sup>a</sup> Masaaki Nakamura<sup>a</sup> and Shinya Hayami\*<sup>a,c</sup>

<sup>a</sup>Department of chemistry, Graduate School of Science and Technology, Kumamoto University, 2-39-1 Kurokami, Chuo-ku, Kumamoto 860-8555, Japan.

<sup>b</sup>Department of Chemistry, School of Physical Sciences, Shahjalal University of Science and Technology, Sylhet-3114, Bangladesh.

<sup>c</sup>Institute of Pulsed Power Science (IPPS), Kumamoto University, 2-39-1 Kurokami, Chuo-ku, Kumamoto 860-8555, Japan.

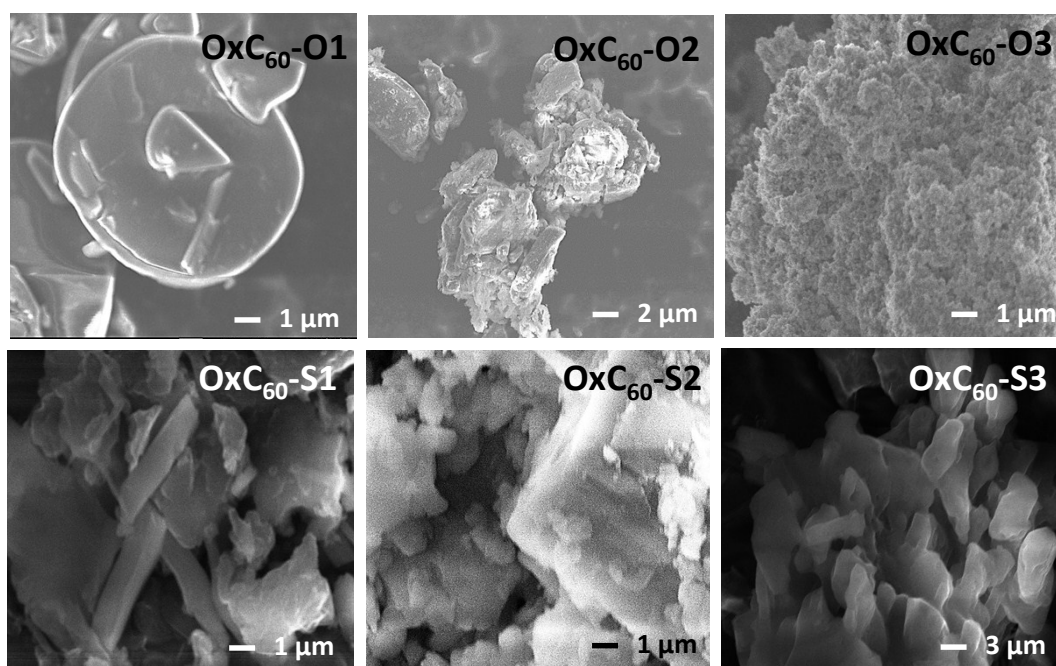

Figure S1. SEM images of fullereneols

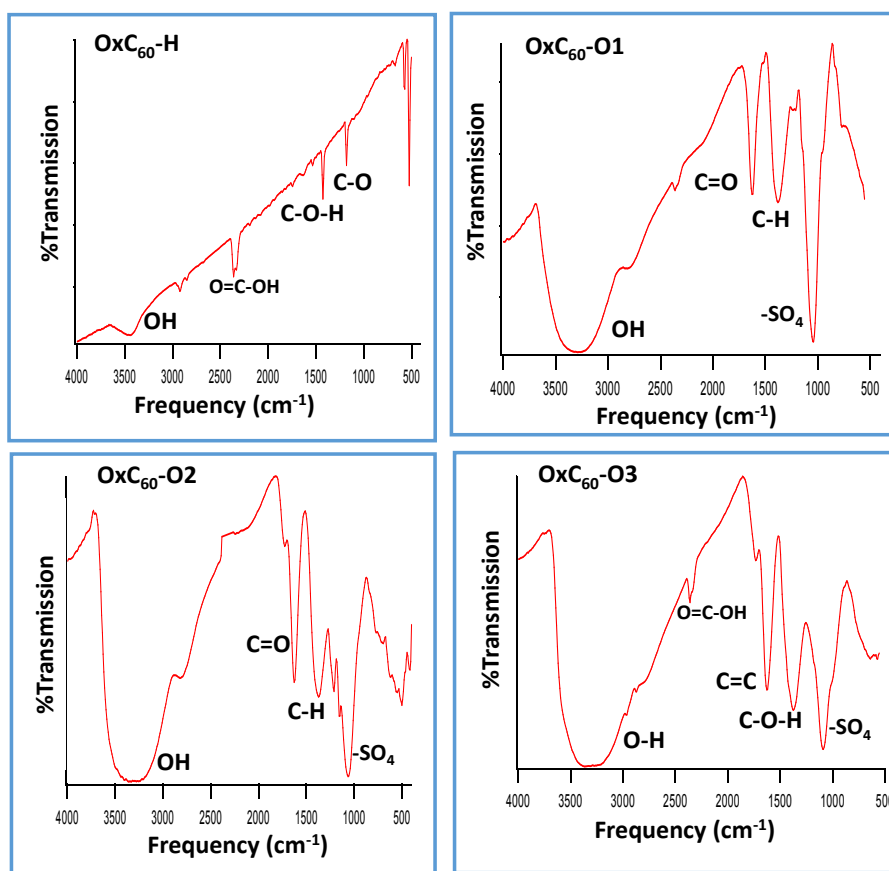

Figure S2. FT-IR spectra of fullereneols prepared by Hummers method and using oleum

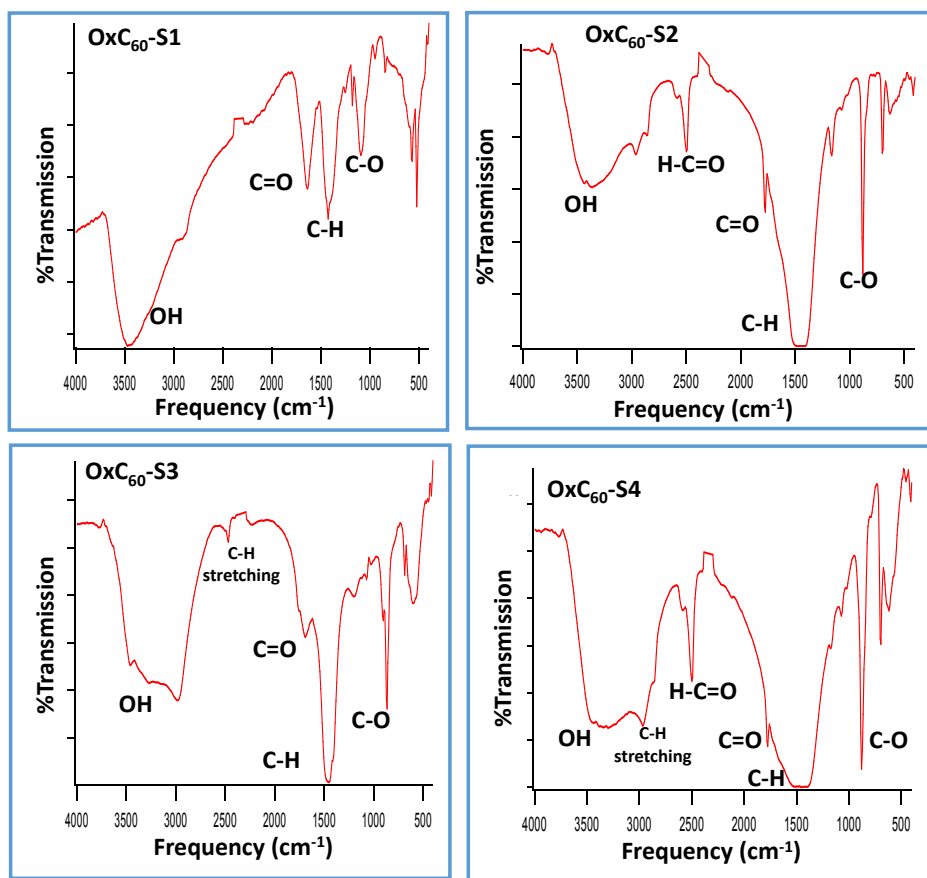

Figure S3. FT-IR spectra of fullerlenols prepared by NaOH

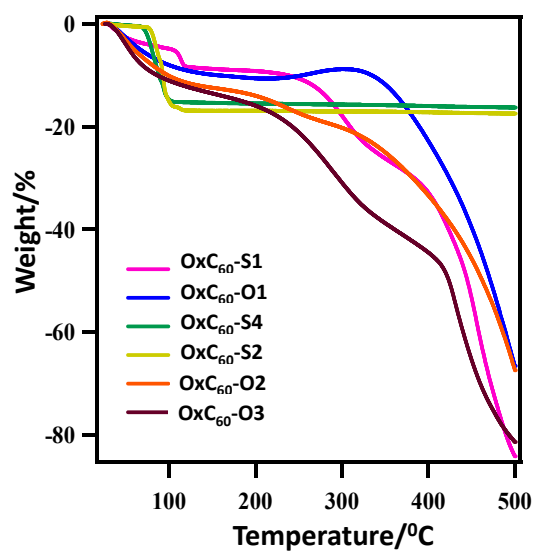

Figure S4. TGA profile of fullerlenols

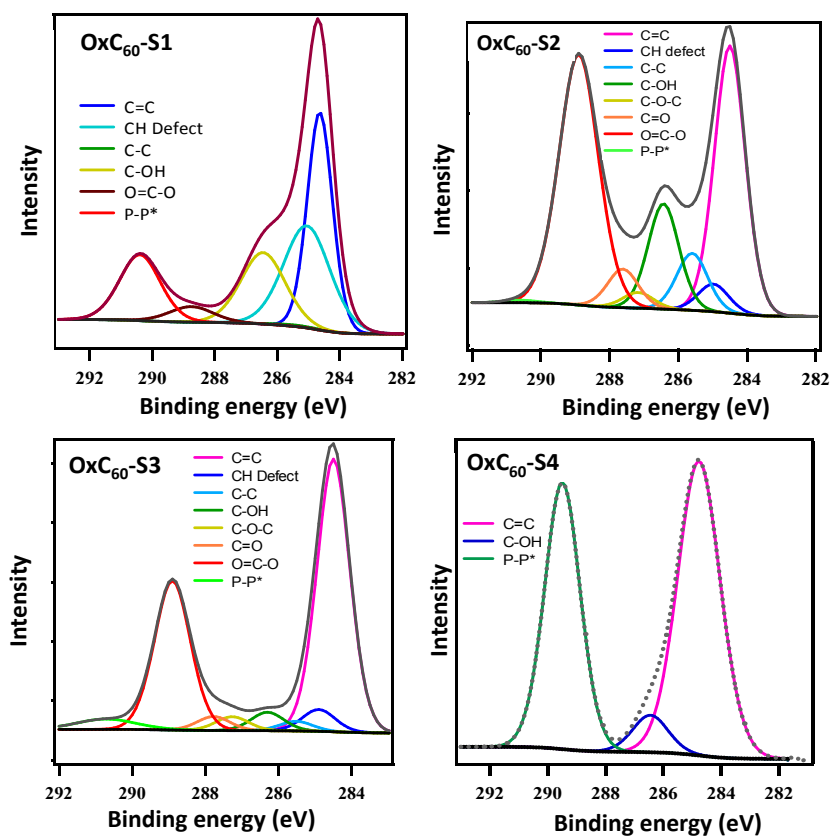

Figure S5. XPS spectra of fullereneols prepared by NaOH

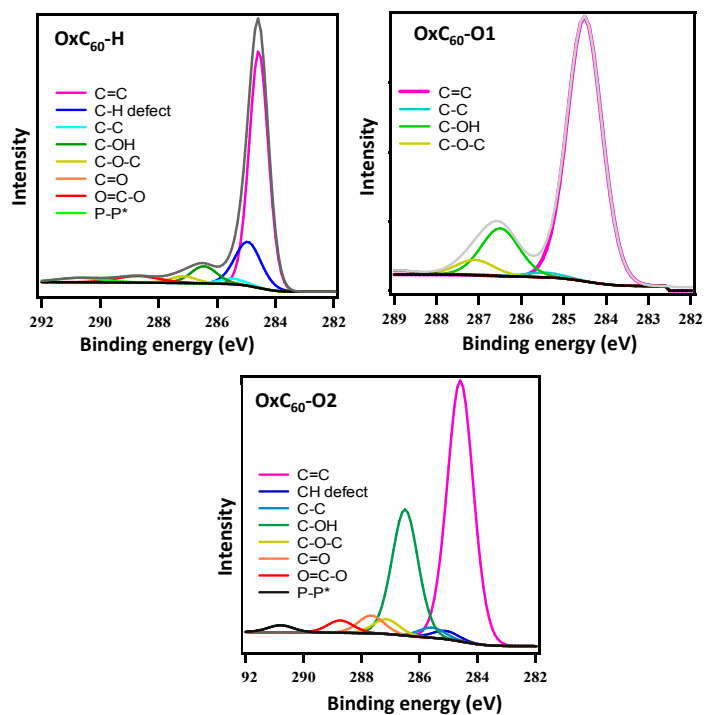

Figure S6. XPS spectra of fullereneols prepared by Hummers' method and using oleum

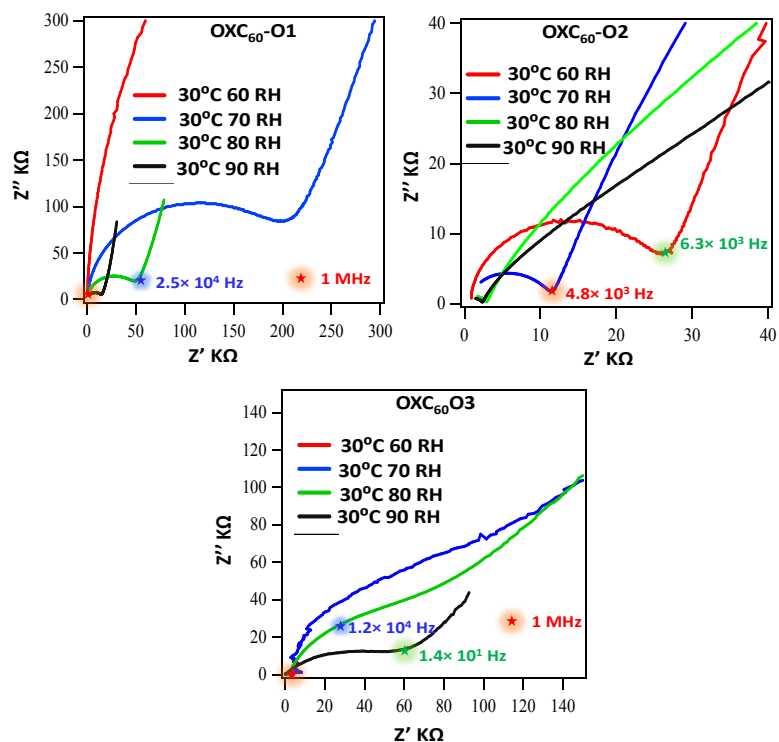

Figure S7. Nyquist Plots at the frequency range of 1Hz to  $10^6$  Hz for fullerenols prepared by oleum

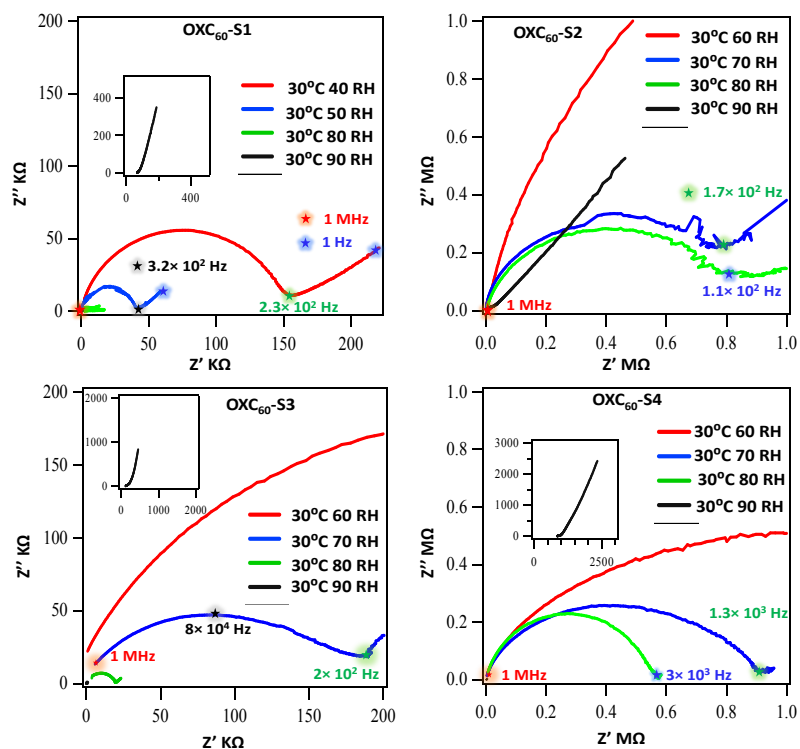

Figure S8. Nyquist Plots at the frequency range of 1Hz to  $10^6$  Hz for fullerenols prepared by caustic soda

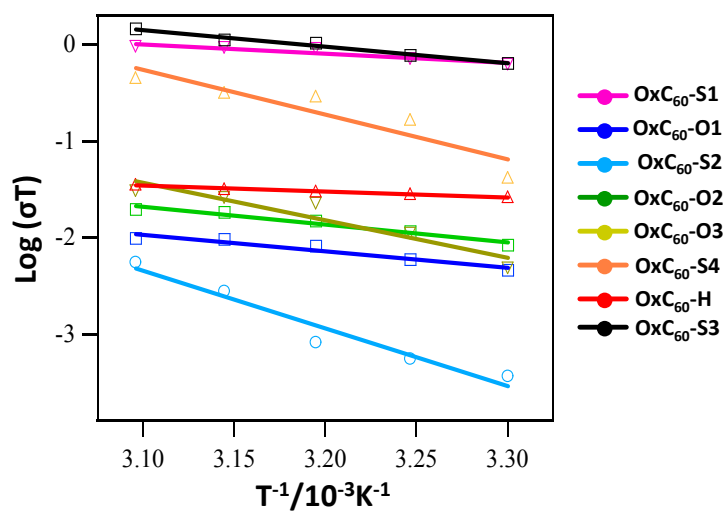

**Figure S9.** Arrhenius plot of all prepared fullerenols.

**Table S1.** CHN elemental analysis of all prepared fullerenols

| Ox-C <sub>60</sub>     | % C   | % H  | % N  |
|------------------------|-------|------|------|
| Ox-C <sub>60</sub> -O1 | 70.57 | 2.23 | 0    |
| Ox-C <sub>60</sub> -O2 | 54.86 | 2.37 | 0    |
| Ox-C <sub>60</sub> -O3 | 51.63 | 3.65 | 0.49 |
| Ox-C <sub>60</sub> -S1 | 77.63 | 2.92 | 0    |
| Ox-C <sub>60</sub> -S2 | 11.01 | 4.92 | 0    |
| Ox-C <sub>60</sub> -S3 | 4.48  | 0.27 | 0    |
| Ox-C <sub>60</sub> -S4 | 8.24  | 0.46 | 0    |

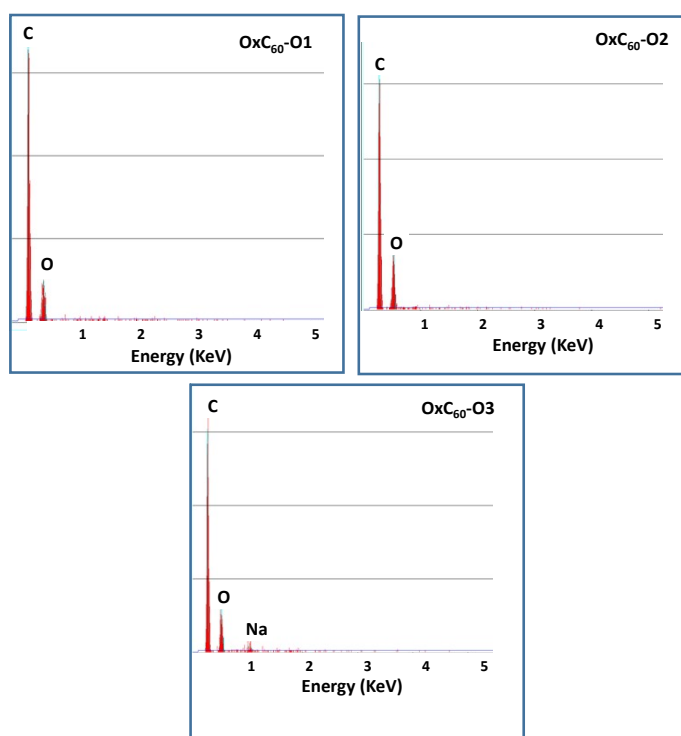

**Figure S10** EDX spectra of fullereneol prepared by oleum

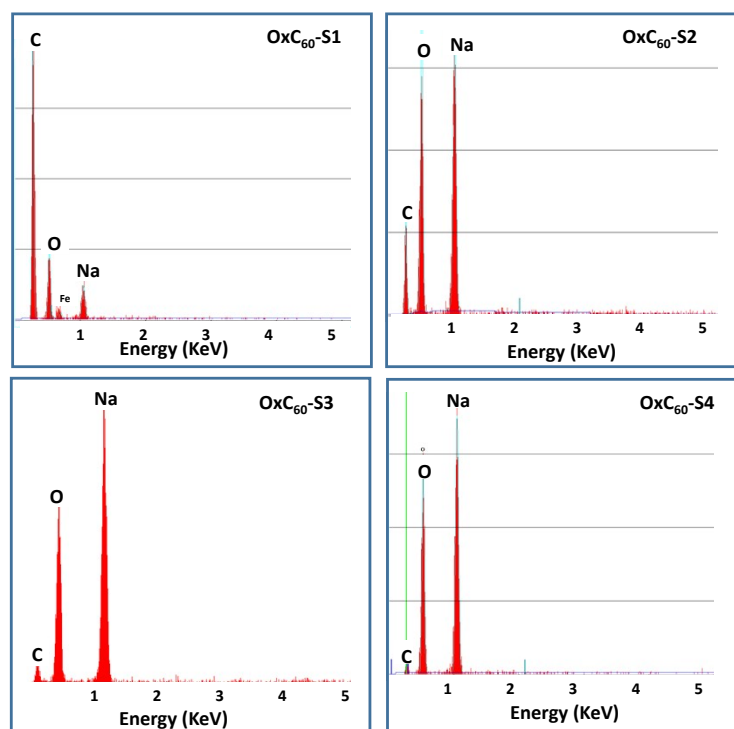

**Figure S11** EDX spectra of fullereneol prepared by caustic soda
